# Supplementary material for: Fine-tuning of the Msn2/4–mediated yeast stress responses as revealed by systematic deletion of Msn2/4 partners
Source: PubMed Central journal article supplement — Mol Biol Cell. 2011 Sep 1;22(17):3127–38. doi: 10.1091/mbc.E10-12-1007 (PMC3164460; doi:10.1091/mbc.e10-12-1007), 2011-09-01
Supplement: supp_E10-12-1007_CombinedSupMats.pdf [file supp_E10-12-1007_CombinedSupMats.pdf]

## Supplementary Information

### **Fine Tuning of the Msn2-Mediated Yeast Stress Responses as Revealed by Systematic Deletion of Msn2/4 Partners**

Amit Sadeh<sup>1</sup>, Natalia Movshovich<sup>2</sup>, Misha Volokh<sup>1</sup>, Leah Gheber<sup>2,3</sup> and Amir Aharoni<sup>1,4\*</sup>

<sup>1</sup>Departments of Life Science, <sup>2</sup>Clinical Biochemistry and <sup>3</sup>Chemistry and <sup>4</sup>The National Institute for Biotechnology in the Negev (NIBN), Ben-Gurion University of the Negev, Be'er Sheva 84105, Israel.

\* Correspondence should be addressed to A.A. (aaharoni@bgu.ac.il)

Corresponding Author:

Dr. Amir Aharoni

Department of Life Sciences

Ben-Gurion University of the Negev

Be'er Sheva 84105, Israel

e-mail: aaharoni@bgu.ac.il

Tel: +972-8-6472645

Fax: +972-8-6479218

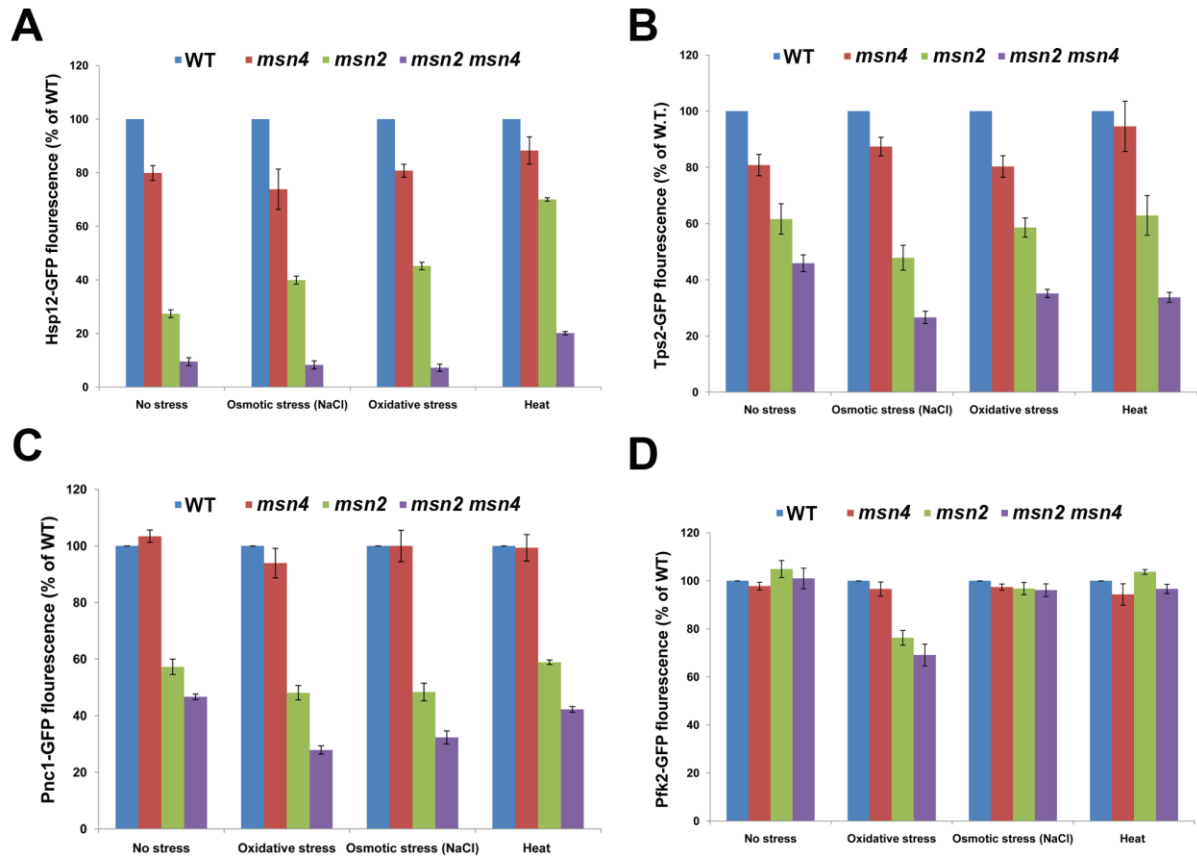

**Fig. S1:** The effects of *msn2* and *msn4* single deletions and *msn2 msn4*-double deletion on the expression levels of Hsp12-GFP (A), Tps2-GFP (B), Pnc1-GFP (C) and Pfk2-GFP (D) following yeast exposure to diverse stress conditions. Yeast strains were exposed to 40 min of osmotic stress (0.5 M NaCl), oxidative stress (0.6 mM H<sub>2</sub>O<sub>2</sub>), and heat stress (temperature shift from 30 to 37°C). Fluorescence levels were determined using flow cytometry (see Material and Methods) and normalized to levels obtained with the WT strain.

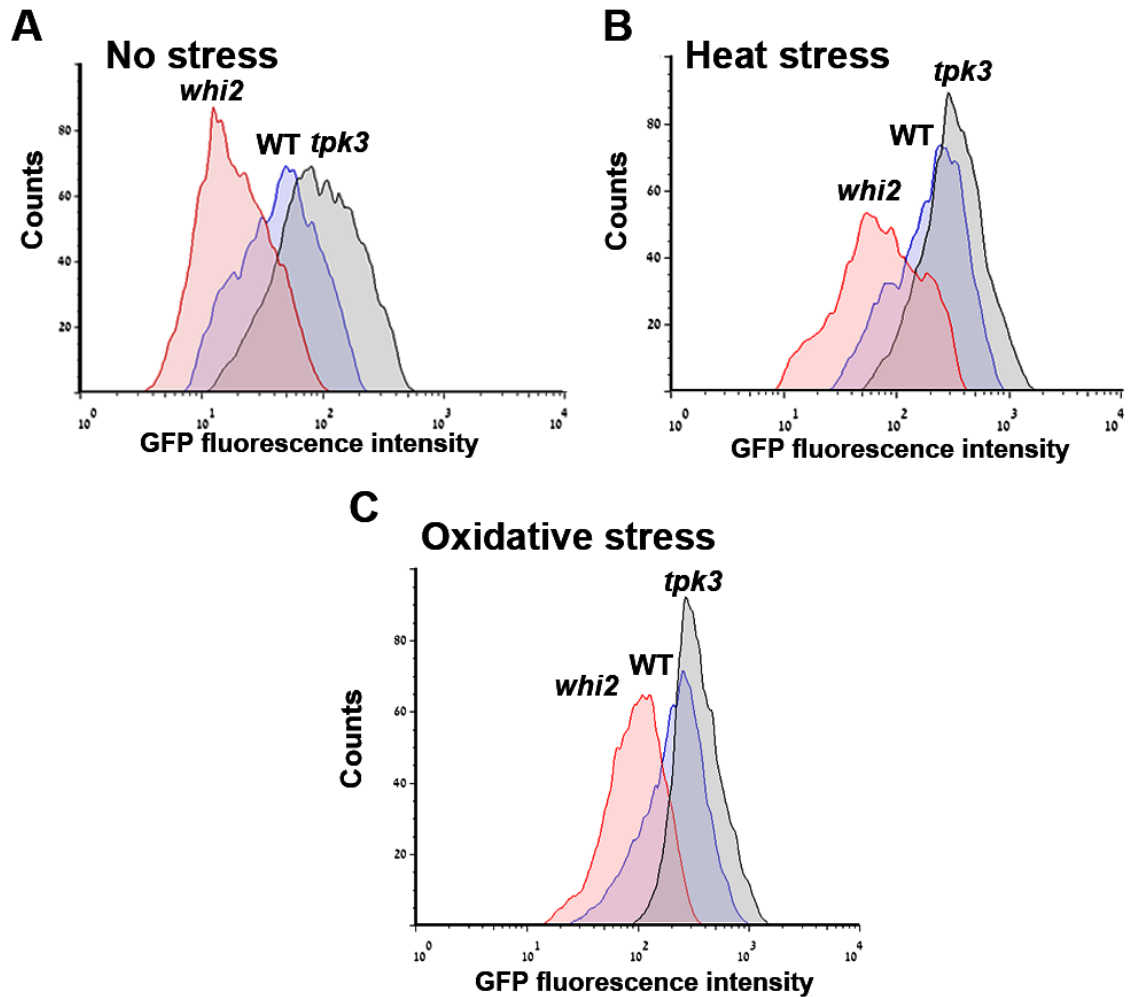

**Fig. S2:** Flow cytometry histogram analysis of Hsp12-GFP expression levels in WT and *whi2*- or *tpk3*-deleted strains under normal growth conditions (A) or following exposure to heat (37°C, B) or oxidative (3 mM of H<sub>2</sub>O<sub>2</sub>, C) stress. Deletion of *WHI2* or *TPK3*, respectively, results in significant decrease or increase in Hsp12-GFP expression levels following yeast exposure to different environmental conditions, respectively.

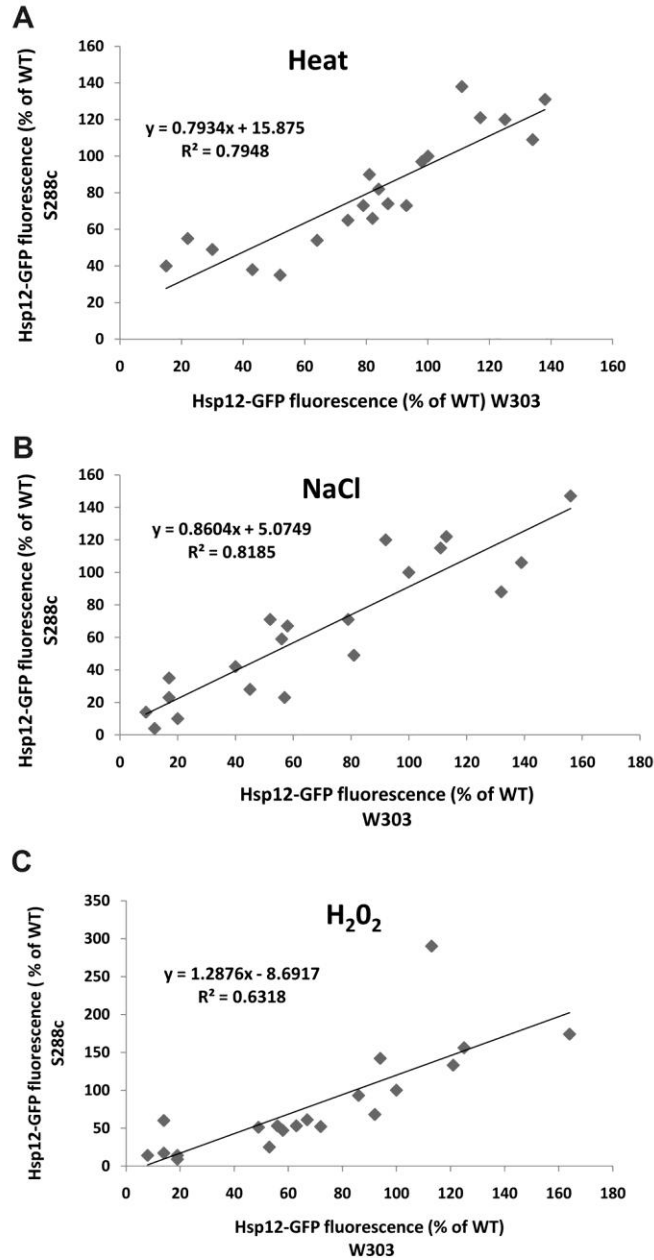

**Fig. S3:** Correlations between the Hsp12-GFP reporter gene expression levels in the S288c- and W303- derived strains following exposure of the deletion strains to heat (**A**), osmotic (0.5 M of NaCl, **B**) and oxidative (3 mM of H<sub>2</sub>O<sub>2</sub>, **C**) stress. Each point represents the expression level of Hsp12-GFP in a specific deletion strain (comprehensive data is presented in Fig. 2-3 main text). The high correlation between the expression levels of the different strains indicates that Msn2 activity is affected similarly in these strains as a result of lost interactions with missing partners.

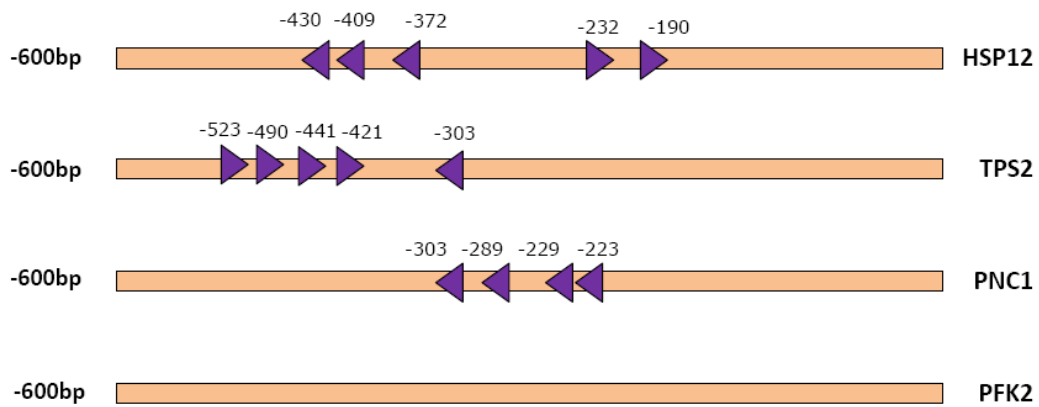

**Fig. S4:** Location of stress response elements (STRE) in the promoter region of the four reporter genes used for the analysis of Msn2/4 transcriptional activity. STRE locations were obtained using the YESTRACT web site (<http://www.yeasttract.com/>) that allows searching for regulatory sites within the yeast genome.

**A**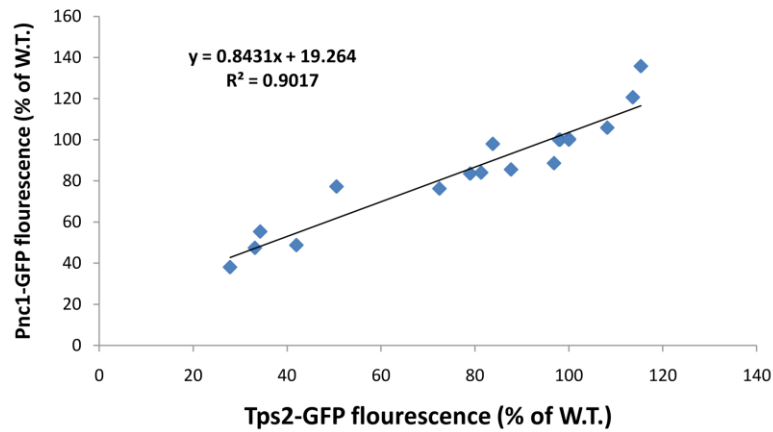**B**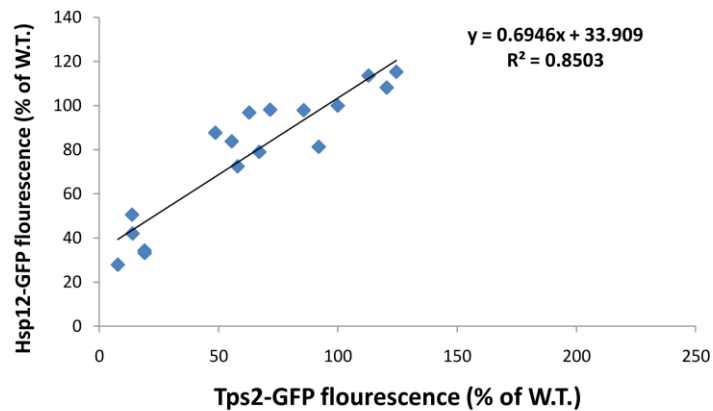

**Fig. S5:** Examples of correlation between the different reporter gene expression levels following exposure of the deletion strains to oxidative stress. Each point represents the expression levels of two reporter genes in a specific deletion strain (comprehensive data is presented in Fig. 3 and Table S3). The high correlation between the expression levels of the different strains indicates that Msn2 activity is affected in these strains as a result of lost interactions with missing partners.

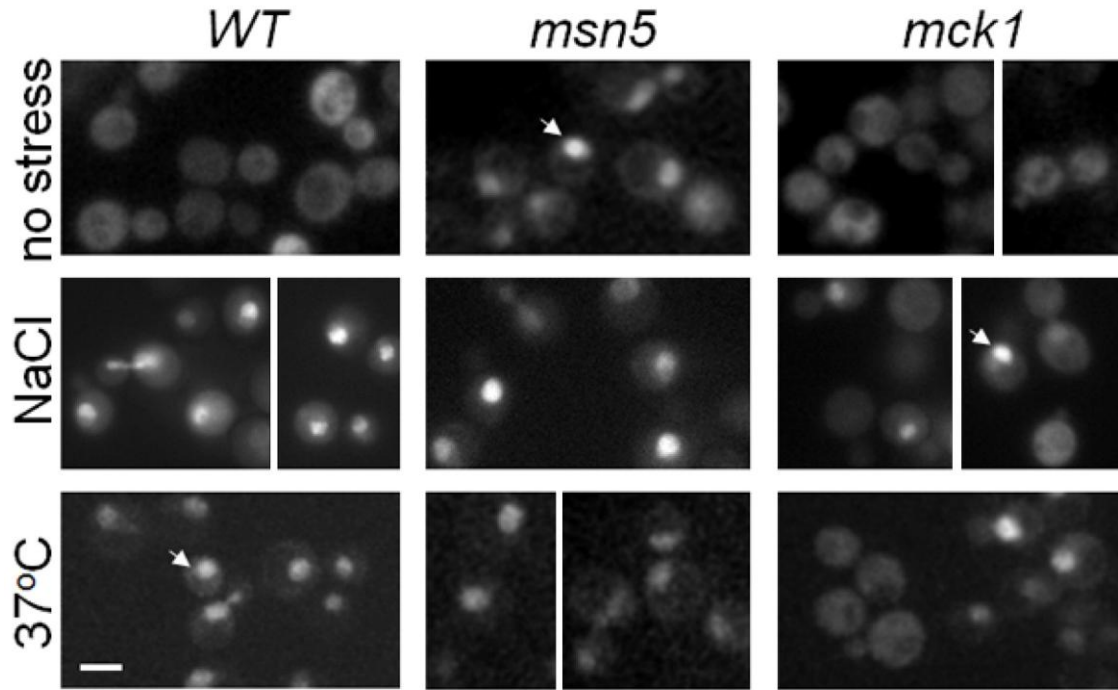

**Fig. S6:** Nuclear localization of Msn2-GFP is significantly reduced in *mck1*-deleted strains following exposure to heat or osmotic stress. Yeast cells expressing Msn2-GFP in WT or *msn5*-, *mck1*-deleted strains were exposed for 15-20 min to NaCl (0.5 M), elevated temperature (37°C) or no stress conditions. The *msn5*-deleted strain serves as a positive control. The percentage of cells containing nuclear-localized Msn2-GFP is 86, 89 and 33 in the WT and the *msn5*- or *mck1*-deleted strains, respectively, following exposure to heat stress. Similar results were obtained following exposure to osmotic stress (99, 94 or 14 in the WT, *msn5*- or *mck1*-deleted strains, respectively). For each strain, 200 cells were analyzed and the percentage of cells containing at least a two-fold increase in nuclear fluorescence was counted as positive. Arrows indicate representative nuclear localization of Msn2-GFP. The scale bar corresponds to 5  $\mu$ .

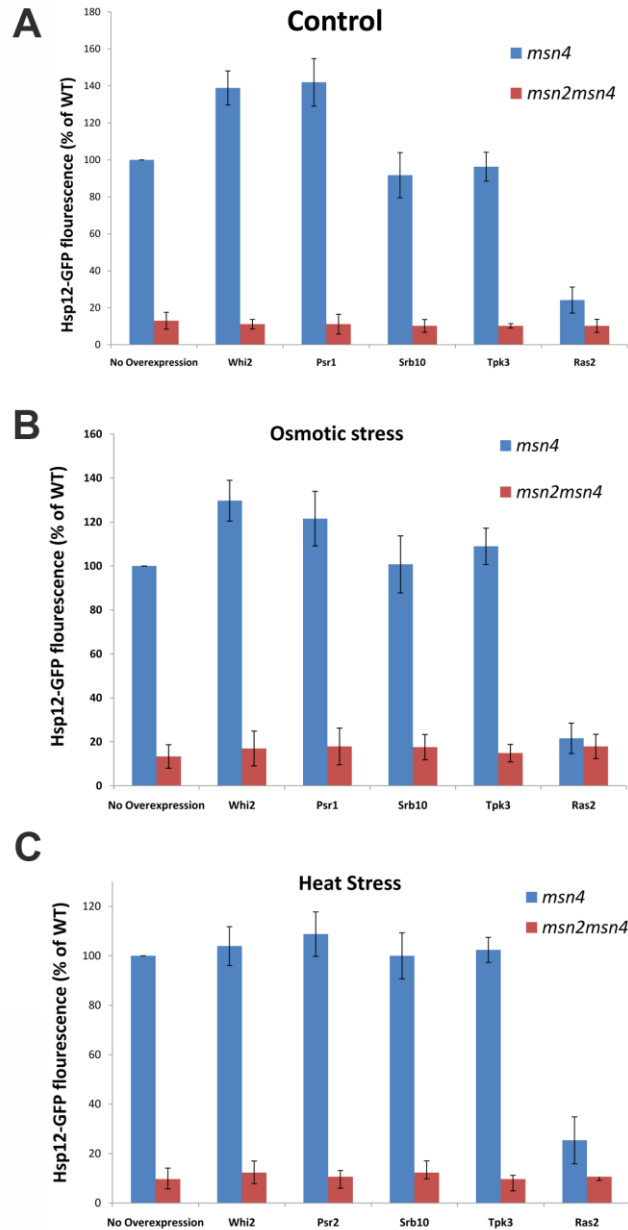

**Fig. S7:** Overexpression of Whi2, Psr1, Srb10, Tpk3 and Ras2 in W303 *msn4*-deleted or *msn2 msn4*-double deleted strains. Overexpression of Whi2 and Psr1 results in increased Hsp12-GFP expression following exposure to osmotic or heat stress, as well as in the absence of stress, indicating an increase in Msn2 activity. In contrast, overexpression of Ras2 results in decrease in Hsp12-GFP expression, indicating a strong suppression of Msn2 activity. These results are consistent with our analysis on the effects of deleting these genes on Msn2 activity.



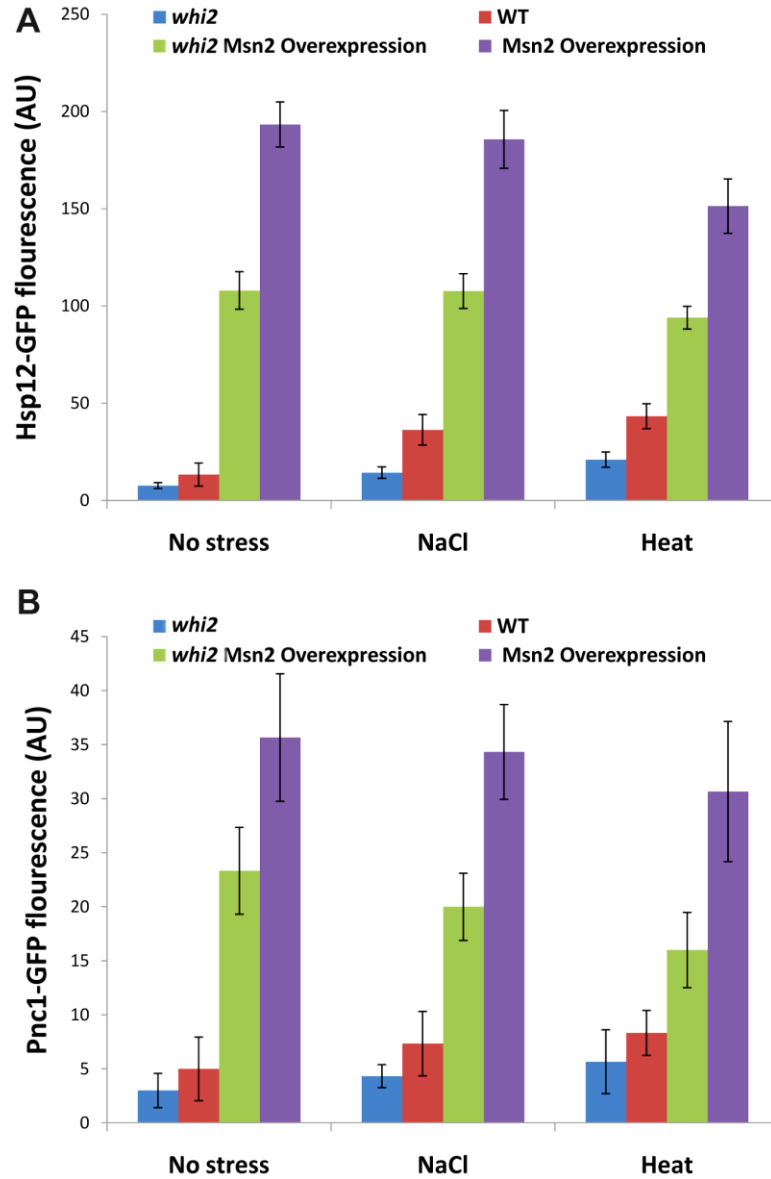

**Fig. S8:** The effect of overexpression of Msn2 on the background of the *whi2*-deleted S288c-derived strain and the WT strain on the expression of Hsp12-GFP (A) or Pnc1-GFP (B) reporter genes. The fluorescence levels of the different strains were examined following exposure to osmotic stress (NaCl), heat stress or in the absence of stress. Msn2 overexpression completely restores Hsp12-GFP or Pnc1-GFP fluorescence, leading to much higher fluorescence than seen in the WT strain.

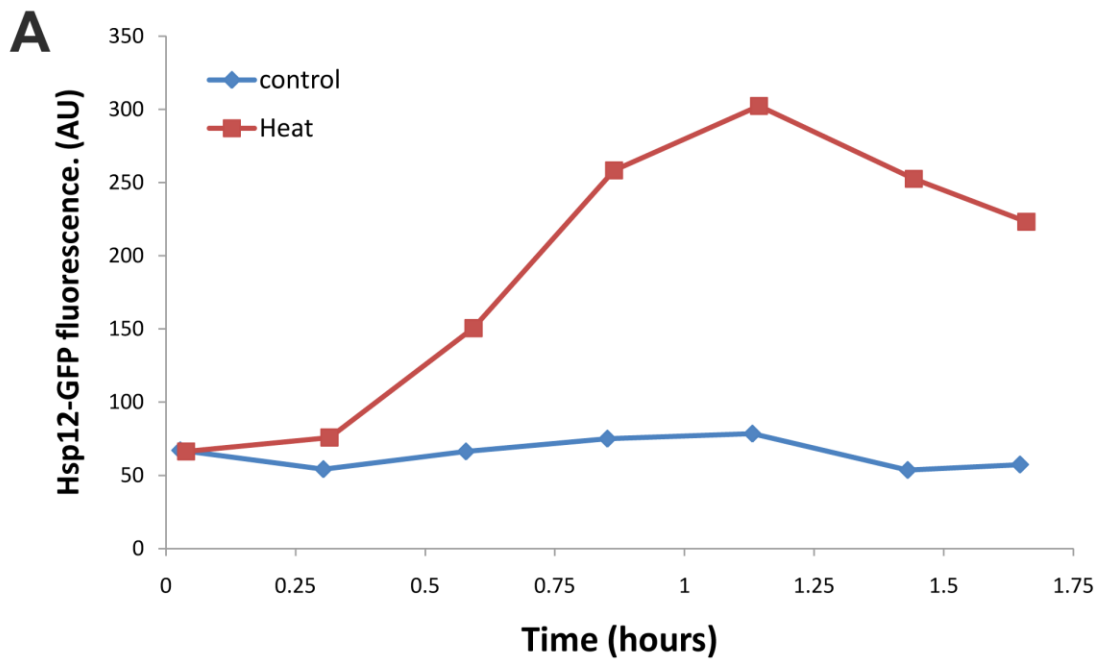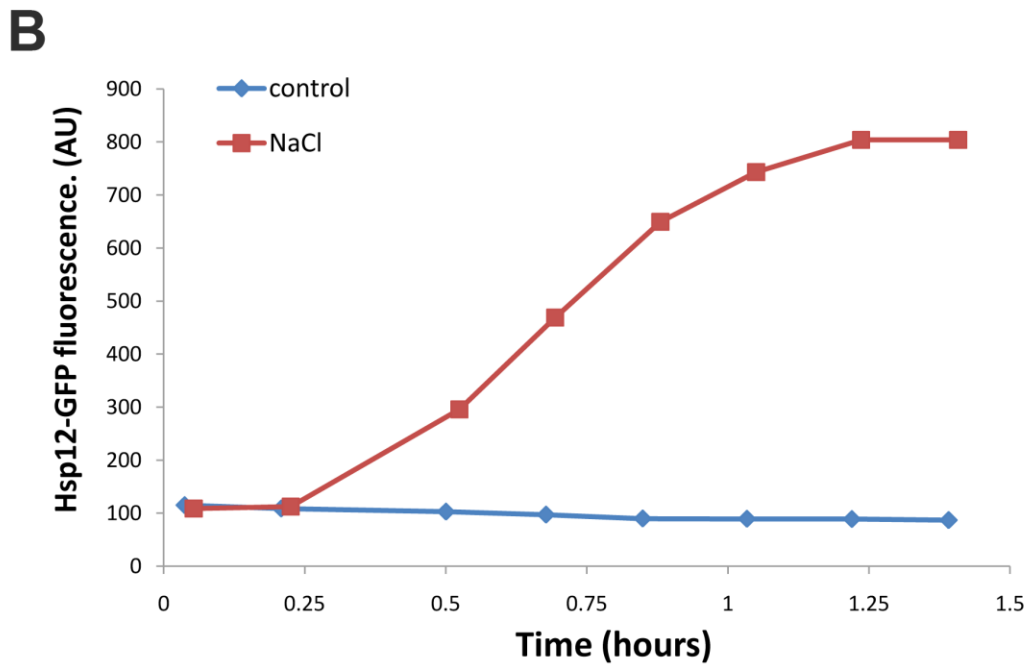

**Fig. S9:** Increase in fluorescence levels of W303 strains containing Hsp12-GFP following application of heat stress (A) or osmotic stress (B). Similar results were obtained with other reporter genes and with S288c strains containing Hsp12-GFP (data not shown).

**Table S1:** Msn2 partners analyzed in this study

| <b>Protein<sup>a</sup></b> | <b>Systematic name</b> | <b>Description</b>                                                                                                                                                                                                                              | <b>Cellular localization</b>            | <b>Null phenotype</b>                                                                                    | <b>Findings in this study</b>                                    |
|----------------------------|------------------------|-------------------------------------------------------------------------------------------------------------------------------------------------------------------------------------------------------------------------------------------------|-----------------------------------------|----------------------------------------------------------------------------------------------------------|------------------------------------------------------------------|
| <b>Glc7 (P)</b>            | YER133W                | Type 1 serine/threonine protein phosphatase catalytic subunit, involved in many processes (eg: glycogen metabolism, sporulation, mitosis).                                                                                                      | Bud neck<br>Nucleus                     | inviable                                                                                                 | activator of Msn2: deletion causes 10-40% reduction in activity. |
| <b>Psr2 (G)</b>            | YLR019W                | Functionally redundant Psr1p homolog, a plasma membrane phosphatase involved in the general stress response; required with Psr1p and Whi2p for full activation of STRE-mediated gene expression, possibly through dephosphorylation of Msn2p    | Plasma membrane                         | viable                                                                                                   | activator of Msn2: deletion causes 10-40% reduction in activity. |
| <b>Psr1 (G)</b>            | YLL010C                | Plasma membrane associated protein phosphatase involved in the general stress response; required along with binding partner Whi2p for full activation of STRE-mediated gene expression, possibly through dephosphorylation of Msn2p             | Plasma membrane                         | viable                                                                                                   | activator of Msn2: deletion causes 10-40% reduction in activity. |
| <b>Tor1 (G)</b>            | YJR066W                | PIK-related protein kinase and rapamycin target; subunit of TORC1, a complex that controls growth in response to nutrients by regulating translation, transcription, ribosome biogenesis, nutrient transport and autophagy; involved in meiosis | cytoplasm<br>Nucleus<br>Plasma membrane | Decreased sensitivity to: heat , oxidative stress<br><br>Increased sensitivity to: cycloheximide, metals | Repressor of Msn2: deletion causes 10-100% increase in activity. |
| <b>Tpk2 (G)</b>            | YPL203W                | cAMP-dependent protein kinase catalytic subunit; promotes vegetative growth in response to nutrients via the Ras-cAMP signaling pathway; partially redundant with Tpk1p and Tpk3p.                                                              | cytoplasm<br>Nucleus                    | Increased Sensitivity to: acid PH                                                                        | activator of Msn2: deletion causes 10-40% reduction in activity. |
| <b>Tpk1 (G)</b>            | YJL164C                | cAMP-dependent protein kinase catalytic subunit; promotes vegetative growth in response to nutrients via the Ras-cAMP signaling pathway; inhibited by regulatory subunit Bcy1p in the absence of                                                | Cytoplasm<br>Nucleus                    | Increased Sensitivity to: hyper osmotic stress, ethanol                                                  | Repressor of Msn2: deletion causes 10-100% increase in activity. |

|                  |         |                                                                                                                                                                                                                                                |                            |                                                                                          |                                                                          |
|------------------|---------|------------------------------------------------------------------------------------------------------------------------------------------------------------------------------------------------------------------------------------------------|----------------------------|------------------------------------------------------------------------------------------|--------------------------------------------------------------------------|
|                  |         | cAMP; partially redundant with Tpk2p and Tpk3p                                                                                                                                                                                                 |                            |                                                                                          |                                                                          |
| <b>Tpk3 (G)</b>  | YKL166C | cAMP-dependent protein kinase catalytic subunit; promotes vegetative growth in response to nutrients via the Ras-cAMP signaling pathway; partially redundant with Tpk1p and Tpk2p.                                                             | Cytoplasm<br>Nucleus       |                                                                                          | Strong Repressor of Msn2: deletion causes 100-200% increase in activity. |
| <b>Mck1 (G)</b>  | YNL307C | Protein serine/threonine/tyrosine (dual-specificity) kinase involved in control of chromosome segregation and in regulating entry into meiosis; related to mammalian glycogen synthase kinases of the GSK-3 family                             | Soluble fraction           | Increased Sensitivity to: UV, heat, hyper osmotic stress, oxidative stress, hydroxyurea. | Strong activator of Msn2: deletion causes 40-90% reduction in activity.  |
| <b>Mrk1 (G)</b>  | YDL079C | Glycogen synthase kinase 3 (GSK-3) homolog; one of four GSK-3 homologs in <i>S. cerevisiae</i> that function to activate Msn2p-dependent transcription of stress responsive genes and that function in protein degradation                     | Cellular component unknown | viable                                                                                   | No visible effect on Msn2 activity was observed                          |
| <b>Rim11 (G)</b> | YMR139W | Protein kinase required for signal transduction during entry into meiosis; promotes the formation of the Ime1p-Ume6p complex by phosphorylating Ime1p and Ume6p; shares similarity with mammalian glycogen synthase kinase 3-beta              | cytoplasm                  | viable                                                                                   | No visible effect on Msn2 activity was observed                          |
| <b>Ygk3 (G)</b>  | YOL128C | Protein kinase related to mammalian glycogen synthase kinases of the GSK-3 family; GSK-3 homologs (Mck1p, Rim11p, Mrk1p, Ygk3p) are involved in control of Msn2p-dependent transcription of stress responsive genes and in protein degradation | Cellular component unknown | Viable                                                                                   | No visible effect on Msn2 activity was observed                          |
| <b>Rim15 (G)</b> | YFL033C | Glucose-repressible protein kinase involved in signal transduction during cell proliferation in response to nutrients, specifically the establishment of stationary phase.                                                                     | cytoplasm<br>Nucleus       | Increased Sensitivity to: heat, hyper osmotic stress.                                    | Strong activator of Msn2: deletion causes 40-90% reduction in activity.  |
| <b>Snf1 (P)</b>  | YDR477W | AMP-activated serine/threonine protein kinase . required for transcription of glucose-repressed genes, thermotolerance, sporulation,                                                                                                           | Nucleus                    |                                                                                          | Strong activator of Msn2: deletion causes 40-90% reduction in            |

|                   |         |                                                                                                                                                                                                                                                  |                                  |                                                        |                                                                         |
|-------------------|---------|--------------------------------------------------------------------------------------------------------------------------------------------------------------------------------------------------------------------------------------------------|----------------------------------|--------------------------------------------------------|-------------------------------------------------------------------------|
|                   |         | and peroxisome biogenesis                                                                                                                                                                                                                        | Mitochondrion<br>cytoplasm       |                                                        | activity.                                                               |
| <b>Yak1 (G)</b>   | YJL141C | Serine-threonine protein kinase that is part of a glucose-sensing system involved in growth control in response to glucose availability; translocates from the cytoplasm to the nucleus and phosphorylates Pop2p in response to a glucose signal | Cytoplasm<br>Nucleus             | Increased Sensitivity to: acid PH                      | activator of Msn2: deletion causes 10-40% reduction in activity.        |
| <b>Hog1 (G)</b>   | YLR113W | Mitogen-activated protein kinase involved in osmoregulation via three independent osmosensors; mediates the recruitment and activation of RNA Pol II at Hot1p-dependent promoters; localization regulated by Ptp2p and Ptp3p                     | Cytoplasm                        | Increased Sensitivity to: hyper osmotic stress, metals | Strong activator of Msn2: deletion causes 40-90% reduction in activity. |
| <b>Tor2 (G)</b>   | YKL203C | PIK-related protein kinase and rapamycin target; subunit of TORC1, a complex that regulates growth in response to nutrients and TORC2, a complex that regulates cell-cycle dependent polarization of the actin cytoskeleton; involved in meiosis | Mitochondrion<br>Plasma membrane | inviable                                               | Repressor of Msn2: deletion causes 10-100% increase in activity.        |
| <b>Srb10 (P)</b>  | YPL042C | Cyclin-dependent protein kinase, component of RNA polymerase II holoenzyme; involved in phosphorylation of the RNA polymerase II C-terminal domain; involved in glucose repression                                                               | Nucleus                          | Increased Sensitivity to: heat                         | Repressor of Msn2: deletion causes 10-100% increase in activity.        |
| <b>Hsp82 (G)</b>  | YPL240C | Hsp90 chaperone required for pheromone signaling and negative regulation of Hsf1p; docks with Tom70p for mitochondrial preprotein delivery.                                                                                                      | cytoplasm                        | viable                                                 | No visible effect on Msn2 activity was observed                         |
| <b>Hsp104 (G)</b> | YLL026W | Heat shock protein that cooperates with Ydj1p (Hsp40) and Ssa1p (Hsp70) to refold and reactivate previously denatured, aggregated proteins; responsive to stresses including: heat, ethanol, and sodium arsenite.                                | Cytoplasm<br>Nucleus             | Increased Sensitivity to: heat                         | No visible effect on Msn2 activity was observed                         |
| <b>Snf2 (P)</b>   | YOR290C | Catalytic subunit of the SWI/SNF chromatin remodeling complex                                                                                                                                                                                    | Nucleus                          | Increased Sensitivity to:                              | No visible effect on Msn2 activity                                      |

|                 |         |                                                                                                                                                                                                                                                 |                          |                                                                         |                                                                          |
|-----------------|---------|-------------------------------------------------------------------------------------------------------------------------------------------------------------------------------------------------------------------------------------------------|--------------------------|-------------------------------------------------------------------------|--------------------------------------------------------------------------|
|                 |         | involved in transcriptional regulation; contains DNA-stimulated ATPase activity; functions interdependently in transcriptional activation with Snf5p and Snf6p                                                                                  |                          | UV.<br>Hydroxyurea,<br>MMS.                                             | was observed                                                             |
| <b>Gis1 (G)</b> | YDR096W | Histone demethylase; transcription factor involved in the expression of genes during nutrient limitation.                                                                                                                                       | Mitochondrion<br>Nucleus | viable                                                                  | activator of Msn2: deletion causes 10-40% reduction in activity.         |
| <b>Eaf7 (P)</b> | YNL136W | Subunit of the NuA4 histone acetyltransferase complex, which acetylates the N-terminal tails of histones H4 and H2A                                                                                                                             | Nucleus                  | Increased Sensitivity to: acid PH, heat, hyper osmotic stress, ethanol, | Strong Repressor of Msn2: deletion causes 100-200% increase in activity. |
| <b>Eaf1 (G)</b> | YDR359C | Component of the NuA4 histone acetyltransferase complex; acts as a platform for assembly of NuA4 subunits into the native complex; required for initiation of pre-meiotic DNA replication, likely due to its requirement for expression of IME1 | Nucleus                  | Increased Sensitivity to: heat, rapamycin, MMS, oxidative stress.       | No visible effect on Msn2 activity was observed                          |
| <b>Gcn5 (G)</b> | YGR252W | Histone acetyltransferase, acetylates N-terminal lysines on histones H2B and H3; catalytic subunit of the ADA and SAGA histone acetyltransferase complexes; founding member of the Gcn5p-related N-acetyltransferase superfamily                | Nucleus                  | Increased Sensitivity to: alkaline PH, heat, metals, , ethanol          | activator of Msn2: deletion causes 10-40% reduction in activity.         |
| <b>Rpd3 (G)</b> | YNL330C | Histone deacetylase; regulates transcription, silencing, and other processes by influencing chromatin remodeling; forms at least two different complexes which have distinct functions and members                                              | Nucleus                  | Increased sensitivity to: MMS, cycloheximide                            | Strong activator of Msn2: deletion causes 40-90% reduction in activity.  |
| <b>Hda3 (G)</b> | YPR179C | Subunit of a possibly tetrameric trichostatin A-sensitive class II histone deacetylase complex that contains an Hda1p homodimer and an Hda2p-Hda3p heterodimer; required for the activity of the complex; has similarity to Hda2p               | Nucleus                  | Increased sensitivity to: cycloheximide                                 | Strong activator of Msn2: deletion causes 40-90% reduction in activity.  |
| <b>Ras2 (G)</b> | YNL098C | GTP-binding protein that regulates the nitrogen starvation response, sporulation, and filamentous growth; farnesylation and                                                                                                                     | Plasma membrane          | Decreased sensitivity to: hyper osmotic stress,                         | Strong Repressor of Msn2: deletion causes 100-200% increase in           |

|                  |         |                                                                                                                                                                                                                                              |                                         |                                                                     |                                                                          |
|------------------|---------|----------------------------------------------------------------------------------------------------------------------------------------------------------------------------------------------------------------------------------------------|-----------------------------------------|---------------------------------------------------------------------|--------------------------------------------------------------------------|
|                  |         | palmitoylation required for activity and localization to plasma membrane; homolog of mammalian Ras proto-oncogenes                                                                                                                           |                                         | rapamycin.                                                          | activity.                                                                |
| <b>Cdc25 (G)</b> | YLR310C | Membrane bound guanine nucleotide exchange factor (GEF or GDP-release factor); indirectly regulates adenylate cyclase through activation of Ras1p and Ras2p by stimulating the exchange of GDP for GTP;                                      | cytoplasm<br>Nucleus<br>Plasma membrane | inviable                                                            | Strong Repressor of Msn2: deletion causes 100-200% increase in activity. |
| <b>Cyr1 (G)</b>  | YJL005W | Adenylate cyclase, required for cAMP production and cAMP-dependent protein kinase signaling; the cAMP pathway controls a variety of cellular processes, including metabolism, cell cycle, stress response, stationary phase, and sporulation |                                         | inviable                                                            | Repressor of Msn2: deletion causes 10-100% increase in activity.         |
| <b>Gal11 (P)</b> | YOL051W | Subunit of the RNA polymerase II mediator complex; associates with core polymerase subunits to form the RNA polymerase II holoenzyme; affects transcription by acting as target of activators and repressors                                 | Nucleus                                 | Increased Sensitivity to: heat , oxidative stress                   | Strong activator of Msn2: deletion causes 40-90% reduction in activity.  |
| <b>Tom1 (G)</b>  | YDR457W | E3 ubiquitin ligase of the hect-domain class; has a role in mRNA export from the nucleus and may regulate transcriptional coactivators; involved in degradation of excess histones                                                           | Nucleus                                 | Increased Sensitivity to: heat, oxidative stress,                   | No visible effect on Msn2 activity was observed                          |
| <b>Whi2 (P)</b>  | YOR043W | Protein required, with binding partner Psr1p, for full activation of the general stress response, possibly through Msn2p dephosphorylation; regulates growth during the diauxic shift; negative regulator of G1 cyclin expression            | Cellular component unknown              | Increased Sensitivity to: acid PH, rapamycin                        | Strong activator of Msn2: deletion causes 40-90% reduction in activity.  |
| <b>Ump1 (P)</b>  | YBR173C | Short-lived chaperone required for correct maturation of the 20S proteasome; may inhibit premature dimerization of proteasome half-mers; degraded by proteasome upon completion of its assembly                                              | Cytoplasm<br>Nucleus                    | Increased Sensitivity to: heat<br><br>Decreased sensitivity to: MMS | Repressor of Msn2: deletion causes 10-100% increase in activity.         |
| <b>Bnr1 (G)</b>  | YIL159W | Formin, nucleates the formation of linear actin filaments, involved in cell                                                                                                                                                                  | Bud neck                                | viable                                                              | No visible effect on Msn2 activity                                       |

|                 |         |                                                                                                                                                                                                                                         |                      |                                                                        |                                                                                               |
|-----------------|---------|-----------------------------------------------------------------------------------------------------------------------------------------------------------------------------------------------------------------------------------------|----------------------|------------------------------------------------------------------------|-----------------------------------------------------------------------------------------------|
|                 |         | processes such as budding and mitotic spindle orientation which require the formation of polarized actin cables, functionally redundant with BNI1                                                                                       |                      |                                                                        | was observed                                                                                  |
| <b>Msn5 (G)</b> | YDR335W | Karyopherin involved in nuclear import and export of proteins, including import of replication protein A and export of Swi6p, Far1p, and Pho4p; required for re-export of mature tRNAs after their retrograde import from the cytoplasm | Cytoplasm<br>Nucleus | Increased sensitivity to: cycloheximide                                | Activator of Msn2: deletion causes 10-40% reduction in activity.                              |
| <b>Sok2 (P)</b> | YMR016C | Nuclear protein that plays a regulatory role in the cyclic AMP (cAMP)-dependent protein kinase (PKA) signal transduction pathway; negatively regulates pseudohyphal differentiation; homologous to several transcription factors        | Nucleus              | Increased sensitivity to: cycloheximide, hyper osmotic stress, ethanol | Deletion elevates HSP12 expression by 100-700% in a pathway only partially dependent on MSN2. |

<sup>a</sup> Msn2 partners highlighted in red are phosphatases, partners highlighted in blue are kinases, partners highlighted in purple are chaperones, partners highlighted in green are chromatin remodelers and partners in black exhibit diverse functions. Partners that are in physical or genetic interaction with Msn2 are depicted in (P) or (G), respectively.



**Table S2:** Percentage of Hsp12-GFP expression levels<sup>a</sup> in 35 Msn2 partner-deleted strains<sup>b</sup> normalized to expression in the WT strain (source of data for **Fig. 2**, main text).

| <b>Gene deletion</b> | <b>No stress</b> | <b>Oxidative<sup>b</sup><br/>stress</b> | <b>Osmotic<sup>b</sup><br/>stress</b> | <b>Heat<sup>b</sup><br/>stress</b> |
|----------------------|------------------|-----------------------------------------|---------------------------------------|------------------------------------|
| <i>rpd3</i>          | 14               | 8                                       | 5                                     | 34                                 |
| <i>mck1</i>          | 16               | 9                                       | 4                                     | 35                                 |
| <i>hda3</i>          | 19               | 21                                      | 12                                    | 20                                 |
| <i>whi2</i>          | 23               | 14                                      | 10                                    | 38                                 |
| <i>msn2</i>          | 21               | 14                                      | 14                                    | 40                                 |
| <i>snf1</i>          | 25               | 25                                      | 23                                    | 54                                 |
| <i>gal11</i>         | 42               | 17                                      | 23                                    | 55                                 |
| <i>rim15</i>         | 27               | 47                                      | 28                                    | 65                                 |
| <i>hog1</i>          | 43               | 60                                      | 35                                    | 49                                 |
| <i>msn5</i>          | 40               | 51                                      | 49                                    | 66                                 |
| <i>tpk2</i>          | 43               | 53                                      | 42                                    | 74                                 |
| <i>yak1</i>          | 31               | 52                                      | 59                                    | 73                                 |
| <i>gcn5</i>          | 41               | 21                                      | 54                                    | 100                                |
| <i>gis1</i>          | 46               | 53                                      | 71                                    | 73                                 |
| <i>psr1</i>          | 53               | 61                                      | 67                                    | 82                                 |
| <i>psr2</i>          | 70               | 68                                      | 71                                    | 90                                 |
| <i>glc7</i>          | 58               | 33                                      | 109                                   | 117                                |
| <i>msn4</i>          | 67               | 85                                      | 72                                    | 98                                 |
| <i>tom1</i>          | 79               | 91                                      | 96                                    | 92                                 |
| <i>snf2</i>          | 72               | 125                                     | 73                                    | 104                                |
| <i>eaf1</i>          | 78               | 127                                     | 98                                    | 101                                |
| <i>hsp104</i>        | 75               | 104                                     | 103                                   | 111                                |
| <i>bnr1</i>          | 84               | 93                                      | 101                                   | 99                                 |
| <i>WT</i>            | 100              | 100                                     | 100                                   | 100                                |
| <i>rim11</i>         | 94               | 96                                      | 115                                   | 96                                 |
| <i>ygk3</i>          | 93               | 93                                      | 120                                   | 97                                 |
| <i>hsp82</i>         | 103              | 105                                     | 95                                    | 102                                |
| <i>mrk1</i>          | 114              | 101                                     | 106                                   | 102                                |
| <i>tpk1</i>          | 132              | 133                                     | 88                                    | 121                                |
| <i>srb10</i>         | 88               | 156                                     | 122                                   | 138                                |
| <i>ump1</i>          | 177              | 142                                     | 106                                   | 131                                |
| <i>cyr1</i>          | 148              | 185                                     | 121                                   | 108                                |
| <i>tor1</i>          | 153              | 199                                     | 99                                    | 118                                |
| <i>tor2</i>          | 174              | 205                                     | 123                                   | 109                                |
| <i>cdc25</i>         | 195              | 208                                     | 122                                   | 118                                |
| <i>eaf7</i>          | 256              | 174                                     | 147                                   | 109                                |
| <i>tpk3</i>          | 292              | 290                                     | 115                                   | 120                                |
| <i>ras2</i>          | 860              | 532                                     | 246                                   | 356                                |

<sup>a</sup> Median Hsp12-GFP expression levels normalized relative to level seen in the WT strain. All data were obtained by flow cytometry (see Fig. S2 for examples and Material and Methods).

<sup>b</sup> The stresses applied are oxidative stress (0.6 mM H<sub>2</sub>O<sub>2</sub>), osmotic stress (0.5 M NaCl) and heat stress (37°C).

**Table S3:** Percentage of reporter gene expression levels<sup>a</sup> in 18 Msn2 partner-deleted strains normalized to expression in the *msn4*-deletion strain (source of data for **Fig. 3**).

| Strain <sup>c</sup>     | Heat stress <sup>b</sup> |      |      |      | Osmotic stress <sup>b</sup> |      |      |      | Oxidative stress <sup>b</sup> |      |      |      | No stress |      |      |      |
|-------------------------|--------------------------|------|------|------|-----------------------------|------|------|------|-------------------------------|------|------|------|-----------|------|------|------|
|                         | HSP12                    | TPS2 | PNC1 | PFK2 | HSP12                       | TPS2 | PNC1 | PFK2 | HSP12                         | TPS2 | PNC1 | PFK2 | HSP12     | TPS2 | PNC1 | PFK2 |
| <i>msn2</i>             | 15                       | 37   | 42   | 97   | 9                           | 38   | 32   | 96   | 8                             | 38   | 28   | 69   | 19        | 55   | 47   | 101  |
| <i>mck1</i>             | 52                       | 57   | 57   | 95   | 12                          | 45   | 47   | 103  | 19                            | 47   | 33   | 93   | 24        | 53   | 52   | 110  |
| <i>whi2</i>             | 43                       | 64   | 59   | 94   | 20                          | 42   | 51   | 95   | 19                            | 55   | 34   | 70   | 32        | 58   | 56   | 98   |
| <i>hog1</i>             | 30                       | 59   | 69   | 88   | 17                          | 49   | 74   | 79   | 14                            | 49   | 42   | 98   | 22        | 63   | 65   | 100  |
| <i>gal11</i>            | 22                       | 95   | 49   | 103  | 17                          | 71   | 58   | 99   | 14                            | 77   | 51   | 101  | 63        | 87   | 92   | 118  |
| <i>rim15</i>            | 74                       | 83   | 75   | 99   | 45                          | 76   | 67   | 98   | 58                            | 76   | 72   | 81   | 44        | 74   | 72   | 98   |
| <i>tpk2</i>             | 87                       | 102  | 90   | 98   | 40                          | 97   | 73   | 101  | 56                            | 98   | 84   | 99   | 49        | 88   | 82   | 100  |
| <i>gis1</i>             | 93                       | 92   | 98   | 109  | 52                          | 84   | 94   | 113  | 63                            | 89   | 97   | 119  | 39        | 81   | 87   | 100  |
| <i>psr1</i>             | 84                       | 84   | 89   | 96   | 58                          | 80   | 91   | 97   | 67                            | 84   | 79   | 95   | 78        | 77   | 80   | 98   |
| <i>psr2</i>             | 81                       | 87   | 83   | 102  | 79                          | 80   | 78   | 104  | 92                            | 84   | 81   | 105  | 84        | 81   | 77   | 101  |
| <i>msn5</i>             | 82                       | 85   | 121  | 103  | 81                          | 82   | 132  | 101  | 49                            | 86   | 88   | 101  | 88        | 106  | 166  | 97   |
| <i>yak1</i>             | 79                       | 100  | 87   | 94   | 56                          | 102  | 94   | 100  | 72                            | 100  | 98   | 100  | 50        | 98   | 95   | 98   |
| <i>snf1</i>             | 64                       | 107  | 97   | 102  | 57                          | 97   | 76   | 106  | 53                            | 103  | 80   | 102  | 37        | 99   | 75   | 104  |
| <i>ygk3</i>             | 98                       | 95   | 99   | 97   | 92                          | 100  | 94   | 100  | 86                            | 100  | 98   | 102  | 69        | 95   | 93   | 99   |
| <b>WT*</b> <sup>d</sup> | 100                      | 100  | 100  | 100  | 100                         | 100  | 100  | 100  | 100                           | 100  | 100  | 100  | 100       | 100  | 100  | 100  |
| <i>tpk1</i>             | 117                      | 105  | 111  | 99   | 132                         | 100  | 100  | 104  | 121                           | 106  | 108  | 100  | 166       | 100  | 126  | 101  |
| <i>srb10</i>            | 111                      | 123  | 112  | 84   | 113                         | 131  | 129  | 85   | 125                           | 136  | 115  | 94   | 130       | 165  | 150  | 79   |
| <i>tpk3</i>             | 125                      | 120  | 108  | 100  | 111                         | 117  | 120  | 103  | 113                           | 121  | 114  | 107  | 187       | 137  | 141  | 102  |
| <i>ump1</i>             | 138                      | 104  | 81   | 93   | 139                         | 103  | 89   | 97   | 94                            | 102  | 74   | 106  | 248       | 104  | 90   | 96   |
| <i>eaf7</i>             | 134                      | 104  | 110  | 93   | 156                         | 96   | 122  | 96   | 164                           | 99   | 119  | 94   | 261       | 95   | 127  | 92   |

<sup>a</sup> Median reporter gene expression levels normalized relative to level seen in the *msn4*-deleted strain. All data were obtained by flow cytometry (see Fig. S2 for examples and Material and Methods).

<sup>b</sup> The stress applied are oxidative stress (0.6 mM H<sub>2</sub>O<sub>2</sub>), osmotic stress (0.5 M NaCl) and heat stress (37°C).

<sup>c</sup> All strains were generated on the background of the *msn4*-deletion strain.

<sup>d</sup> WT\* strain is deleted of the *MSN4* gene.

**Table S4:** References for Msn2/4-regulated expression of *HSP12*, *TPS2*, *PNC1* and *PF2* reporter genes (data was obtained from the *Saccharomyces* genome database (SGD) site, <http://www.yeastgenome.org/>)

| ORF/Gene            | Description                                                                                                                                                                                                                                    | Evidence for MSN2/4 regulation                                                                                                                                                                                                                                                                                                                                                                                                                                                                                                                                                                                                                                                                                                                                                                                                                                                                                                                                                                                                                                                                                                                                                                                                                                                                                                                                                                                                                                                                                                                                                                                                                                                                                                                                                                                                                                                                                                                                                                                                                                                                                                          |
|---------------------|------------------------------------------------------------------------------------------------------------------------------------------------------------------------------------------------------------------------------------------------|-----------------------------------------------------------------------------------------------------------------------------------------------------------------------------------------------------------------------------------------------------------------------------------------------------------------------------------------------------------------------------------------------------------------------------------------------------------------------------------------------------------------------------------------------------------------------------------------------------------------------------------------------------------------------------------------------------------------------------------------------------------------------------------------------------------------------------------------------------------------------------------------------------------------------------------------------------------------------------------------------------------------------------------------------------------------------------------------------------------------------------------------------------------------------------------------------------------------------------------------------------------------------------------------------------------------------------------------------------------------------------------------------------------------------------------------------------------------------------------------------------------------------------------------------------------------------------------------------------------------------------------------------------------------------------------------------------------------------------------------------------------------------------------------------------------------------------------------------------------------------------------------------------------------------------------------------------------------------------------------------------------------------------------------------------------------------------------------------------------------------------------------|
| <b><i>HSP12</i></b> | Plasma membrane-localized protein that protects membranes from desiccation; induced by heat shock, oxidative stress, osmotic stress, stationary phase entry, glucose depletion, oleate and alcohol; regulated by the HOG and Ras-Pka pathways. | <p><b>Direct Evidence:</b><br/> <a href="#">PubMed</a> Erkina et al, Mol Cell Biol, ;28(4):1207-17 (<i>Direct: ChIP</i>)<br/> <a href="#">PubMed</a> Ni L et al., Genes Dev, ;23(11):1351-63 (<i>Direct: ChIP</i>)<br/> <a href="#">PubMed</a> Lenssen E et al., Mol Cell Biol, 2005 Jan;25(1):488-98 (<i>Direct: ChIP</i>)</p> <p><b>Indirect Evidence:</b><br/> <a href="#">PubMed</a> Chua G et al., PNAS, 2006;103(32):12045-50 (<i>Indirect: Microarrays - Wild type vs. TF mutant</i>)<br/> <a href="#">PubMed</a> Melamed et al., RNA, ;14(7):1337-51 (<i>Indirect: Northern blotting - Wild type vs. TF mutant</i>)<br/> <a href="#">PubMed</a> Berry and Gasch, Mol Biol Cell, ;19(11):4580-7 (<i>Indirect: RT-PCR - Wild type vs. TF mutant</i>)<br/> <a href="#">PubMed</a> Garcia et al, J Biol Chem, ;0(0): (<i>Indirect: Microarrays - Wild type vs. TF mutant</i>)-1<br/> <a href="#">PubMed</a> Kelley &amp; Ideker, PLOS Genet, ;5(5):e1000488 (<i>Indirect: Microarrays - Wild type vs. TF mutant</i>)<br/> <a href="#">PubMed</a> Hazelwood et al, Appl Environ Microbiol, ;75(21):6876-6885 (<i>Indirect: Microarrays - Wild type vs. TF mutant</i>)<br/> <a href="#">PubMed</a> Boy-Marcotte E et al., Mol Microbiol, 1999;3(2):274-83 (<i>Indirect: Proteomics - Wild type vs. TF mutant</i>)<br/> <a href="#">PubMed</a> Causton HC et al., Mol Biol Cell, 2001;2(2):323-37 (<i>Indirect: Microarrays - Wild type vs. TF mutant</i>)<br/> <a href="#">PubMed</a> Hasan R et al., Mol Microbiol, 2002;45(1):233-41 (<i>Indirect: Proteomics - Wild type vs. TF mutant</i>)<br/> <a href="#">PubMed</a> Kandror O et al., Mol Cell, 2004;3(6):771-81 (<i>Indirect: Northern blotting - Wild type vs. TF mutant</i>)<br/> <a href="#">PubMed</a> Treger JM et al., J Biol Chem, 1998;73(41):26875-9 (<i>Indirect: Northern blotting - Wild type vs. TF mutant</i>)</p> <p><b>Undefined Evidence:</b><br/> <a href="#">PubMed</a> Martinez-Pastor MT et al., EMBO J, 1996;5(9):2227-35 (<i>Undef</i>)<br/> <a href="#">PubMed</a> Schmitt AP et al., Proc Natl Acad Sci U S A, 1996;3(12):5777-82 (<i>Undef</i>)</p> |
| <b><i>TPS2</i></b>  | Phosphatase subunit of the trehalose-6-phosphate synthase/phosphatase complex, which synthesizes the storage carbohydrate, trehalose; expression is induced by stress conditions and repressed by the Ras-cAMP pathway                         | <p><b>Indirect Evidence:</b><br/> <a href="#">PubMed</a> Horan et al., Yeast, 2006;23(7):519-535 (<i>Indirect: Microarrays - Wild type vs. TF mutant</i>)<br/> <a href="#">PubMed</a> Chua G et al., PNAS, 2006;103(32):12045-50 (<i>Indirect: Microarrays - Wild type vs. TF mutant</i>)<br/> <a href="#">PubMed</a> Berry and Gasch, Mol Biol Cell, ;19(11):4580-7 (<i>Indirect: RT-PCR - Wild type vs. TF mutant</i>)<br/> <a href="#">PubMed</a> Hazelwood et al, Appl Environ Microbiol, ;75(21):6876-6885 (<i>Indirect: Microarrays - Wild type vs. TF mutant</i>)<br/> <a href="#">PubMed</a> Kandror O et al., Mol Cell, 2004;3(6):771-81 (<i>Indirect: Northern blotting - Wild type vs. TF mutant</i>)<br/> <a href="#">PubMed</a> Lai LC et al., Mol Cell Biol, 2005 May;25(10):4075-91 (<i>Indirect: Microarrays - Wild type vs. TF mutant</i>)<br/> <a href="#">PubMed</a> Rep M et al., J Biol Chem, 2000;75(12):8290-300 (<i>Indirect: Microarrays - Wild type vs. TF mutant</i>)<br/> <a href="#">PubMed</a> Schmitt AP et al., Proc Natl Acad Sci U S A, 1996;3(12):5777-82 (<i>Indirect: Northern blotting - Wild type vs. TF mutant</i>)</p>                                                                                                                                                                                                                                                                                                                                                                                                                                                                                                                                                                                                                                                                                                                                                                                                                                                                                                                                                                         |
| <b><i>PNC1</i></b>  | Nicotinamidase that converts nicotinamide to nicotinic acid as part of the NAD(+) salvage pathway, required for life-span extension by calorie restriction; PNC1 expression responds to all known stimuli that                                 | <p><b>Direct Evidence:</b><br/> <a href="#">PubMed</a> Medvedik et al, PLOS Biol, ;5(10):e261 (<i>Direct: ChIP</i>)</p> <p><b>Indirect Evidence:</b><br/> <a href="#">PubMed</a> Berry and Gasch, Mol Biol Cell, ;19(11):4580-7 (<i>Indirect: Microarrays - Wild type vs. TF mutant</i>)<br/> <a href="#">PubMed</a> Kelley &amp; Ideker, PLOS Genet, ;5(5):e1000488 (<i>Indirect: Microarrays - Wild type vs. TF mutant</i>)<br/> <a href="#">PubMed</a> Boy-Marcotte E et al., Mol Microbiol, 1999;3(2):274-83 (<i>Indirect: Proteomics - Wild type vs. TF mutant</i>)<br/> <a href="#">PubMed</a> Hasan R et al., Mol Microbiol, 2002;45(1):233-41 (<i>Indirect: Proteomics - Wild type vs. TF mutant</i>)</p>                                                                                                                                                                                                                                                                                                                                                                                                                                                                                                                                                                                                                                                                                                                                                                                                                                                                                                                                                                                                                                                                                                                                                                                                                                                                                                                                                                                                                       |

|                    |                                                                                                                                                                                                                                 |      |
|--------------------|---------------------------------------------------------------------------------------------------------------------------------------------------------------------------------------------------------------------------------|------|
|                    | extend replicative life-span                                                                                                                                                                                                    |      |
| <b><i>PFK2</i></b> | Beta subunit of heterooctameric phosphofructokinase involved in glycolysis, indispensable for anaerobic growth, activated by fructose-2,6-bisphosphate and AMP, mutation inhibits glucose induction of cell cycle-related genes | none |

**Table S5:** List of strains used in this study

|    | Strain  | Genotype                                                                                                                                                                                                      |                     |                                 |                       | Generated                                    |
|----|---------|---------------------------------------------------------------------------------------------------------------------------------------------------------------------------------------------------------------|---------------------|---------------------------------|-----------------------|----------------------------------------------|
| 1  | W303-1A | <i>MATa {leu2-3,112 trp1-1 can1-100 ura3-1 ade2-1 his3-11,15}</i>                                                                                                                                             |                     |                                 |                       | Martin Kupiec,<br>Tel-Aviv<br>University     |
| 2  | W303-1B | <i>MATα {leu2-3,112 trp1-1 can1-100 ura3-1 ade2-1 his3-11,15}</i>                                                                                                                                             |                     |                                 |                       | Martin Kupiec,<br>Tel-Aviv<br>University     |
| 3  | YRG2    | <i>Mata ura352 his3-200 ade2-101 lys2-801 trp1-901 leu2-3 112 gal4-542 gal80-538</i><br><i>LYS2::UAS<sub>GAL1</sub>-TATA<sub>GAL1</sub>-HIS3 URA3::UAS<sub>GAL4 17mers(x3)</sub>-TATA<sub>CYC1</sub>.lacZ</i> |                     |                                 |                       | Stratagene                                   |
| 4  | YMS140a | <i>S288C his3Δ1 Δleu2 Δmet15 Δura3 Δcan::MFA1pr-leu2 Δlyp1 cyn2</i>                                                                                                                                           |                     |                                 |                       | Maya<br>Schuldiner,<br>Weizmann<br>Institute |
| 5  | AQS1    | <i>YMS140α HSP12::HSP12-GFP-HIS3MX6</i>                                                                                                                                                                       |                     |                                 |                       | This study                                   |
| 6  | AQS2    | <i>YMS140α HSP12::HSP12-GFP-HIS3MX6 whi2:: natMX4</i>                                                                                                                                                         |                     |                                 |                       | This study                                   |
| 7  | GS1*    | <i>msn4::</i><br><i>hphMX4</i>                                                                                                                                                                                |                     |                                 |                       | This study                                   |
| 8  | GS2*    | <i>his3::hphMX4</i>                                                                                                                                                                                           | <i>msn2::kanMX6</i> | <i>Tps2::TPS2-GFP-HIS3MX6</i>   |                       | This study                                   |
| 9  | GS3*    | <i>his3::hphMX4</i>                                                                                                                                                                                           | <i>msn2::kanMX6</i> | <i>PNC1::TPS2-GFP-HIS3MX6</i>   |                       | This study                                   |
| 10 | GS4*    | <i>his3::hphMX4</i>                                                                                                                                                                                           | <i>msn2::kanMX6</i> | <i>HSP12::HSP12-GFP-HIS3MX6</i> |                       | This study                                   |
| 11 | AYC1*   |                                                                                                                                                                                                               |                     | <i>PNC1::PNC1-GFP-HIS3MX6</i>   |                       | This study                                   |
| 12 | AYC2 *  |                                                                                                                                                                                                               | <i>msn2::kanMX6</i> | <i>PNC1::PNC1-GFP-HIS3MX6</i>   |                       | This study                                   |
| 13 | AYC3 *  | <i>msn4::</i><br><i>hphMX4</i>                                                                                                                                                                                |                     | <i>PNC1::PNC1-GFP-HIS3MX6</i>   |                       | This study                                   |
| 14 | AYC4 *  | <i>msn4::</i><br><i>hphMX4</i>                                                                                                                                                                                | <i>msn2::kanMX6</i> | <i>PNC1::PNC1-GFP-HIS3MX6</i>   |                       | This study                                   |
| 15 | AYC5 *  |                                                                                                                                                                                                               |                     | <i>HSP12::HSP12-GFP-HIS3MX6</i> |                       | This study                                   |
| 16 | AYC6 *  |                                                                                                                                                                                                               | <i>msn2::kanMX6</i> | <i>HSP12::HSP12-GFP-HIS3MX6</i> |                       | This study                                   |
| 17 | AYC7 *  | <i>msn4::</i><br><i>hphMX4</i>                                                                                                                                                                                |                     | <i>HSP12::HSP12-GFP-HIS3MX6</i> |                       | This study                                   |
| 18 | AYC8 *  | <i>msn4::</i><br><i>hphMX4</i>                                                                                                                                                                                | <i>msn2::kanMX6</i> | <i>HSP12::HSP12-GFP-HIS3MX6</i> |                       | This study                                   |
| 19 | AYC9*   |                                                                                                                                                                                                               |                     | <i>Tps2::TPS2-GFP-HIS3MX6</i>   |                       | This study                                   |
| 20 | AYC10*  |                                                                                                                                                                                                               | <i>msn2::kanMX6</i> | <i>Tps2::TPS2-GFP-HIS3MX6</i>   |                       | This study                                   |
| 21 | AYC11*  | <i>msn4::</i><br><i>hphMX4</i>                                                                                                                                                                                |                     | <i>Tps2::TPS2-GFP-HIS3MX6</i>   |                       | This study                                   |
| 22 | AYC12*  | <i>msn4::</i><br><i>hphMX4</i>                                                                                                                                                                                | <i>msn2::kanMX6</i> | <i>Tps2::TPS2-GFP-HIS3MX6</i>   |                       | This study                                   |
| 23 | AIC1*   | <i>msn4::</i><br><i>hphMX4</i>                                                                                                                                                                                |                     | <i>HSP12::HSP12-GFP-HIS3MX6</i> | <i>tpk1::natMX4</i>   | This study                                   |
| 24 | AIC2*   | <i>msn4::</i><br><i>hphMX4</i>                                                                                                                                                                                |                     | <i>HSP12::HSP12-GFP-HIS3MX6</i> | <i>tpk2:: natMX4</i>  | This study                                   |
| 25 | AIC3*   | <i>msn4::</i><br><i>hphMX4</i>                                                                                                                                                                                |                     | <i>HSP12::HSP12-GFP-HIS3MX6</i> | <i>tpk3:: natMX4</i>  | This study                                   |
| 26 | AIC4*   | <i>msn4::</i><br><i>hphMX4</i>                                                                                                                                                                                |                     | <i>HSP12::HSP12-GFP-HIS3MX6</i> | <i>rim11:: natMX4</i> | This study                                   |
| 27 | AIC5*   | <i>msn4::</i><br><i>hphMX4</i>                                                                                                                                                                                |                     | <i>HSP12::HSP12-GFP-HIS3MX6</i> | <i>rim15:: natMX4</i> | This study                                   |

|    |        |                     |  |                                 |                       |            |
|----|--------|---------------------|--|---------------------------------|-----------------------|------------|
| 28 | AIC6*  | <i>msn4::hphMX4</i> |  | <i>HSP12::HSP12-GFP-HIS3MX6</i> | <i>gal11:: natMX4</i> | This study |
| 29 | AIC7*  | <i>msn4::hphMX4</i> |  | <i>HSP12::HSP12-GFP-HIS3MX6</i> | <i>psr1:: natMX4</i>  | This study |
| 30 | AIC8*  | <i>msn4::hphMX4</i> |  | <i>HSP12::HSP12-GFP-HIS3MX6</i> | <i>psr2:: natMX4</i>  | This study |
| 31 | AIC9*  | <i>msn4::hphMX4</i> |  | <i>HSP12::HSP12-GFP-HIS3MX6</i> | <i>ump1:: natMX4</i>  | This study |
| 32 | AIC10* | <i>msn4::hphMX4</i> |  | <i>HSP12::HSP12-GFP-HIS3MX6</i> | <i>sok2:: natMX4</i>  | This study |
| 33 | AIC11* | <i>msn4::hphMX4</i> |  | <i>HSP12::HSP12-GFP-HIS3MX6</i> | <i>srb10:: natMX4</i> | This study |
| 34 | AIC12* | <i>msn4::hphMX4</i> |  | <i>HSP12::HSP12-GFP-HIS3MX6</i> | <i>whi2:: natMX4</i>  | This study |
| 35 | AIC13* | <i>msn4::hphMX4</i> |  | <i>HSP12::HSP12-GFP-HIS3MX6</i> | <i>mck1:: natMX4</i>  | This study |
| 36 | AIC14* | <i>msn4::hphMX4</i> |  | <i>HSP12::HSP12-GFP-HIS3MX6</i> | <i>snf1:: natMX4</i>  | This study |
| 37 | AIC15* | <i>msn4::hphMX4</i> |  | <i>HSP12::HSP12-GFP-HIS3MX6</i> | <i>gis1:: natMX4</i>  | This study |
| 38 | AIC16* | <i>msn4::hphMX4</i> |  | <i>HSP12::HSP12-GFP-HIS3MX6</i> | <i>yak1:: natMX4</i>  | This study |
| 39 | AIC17* | <i>msn4::hphMX4</i> |  | <i>HSP12::HSP12-GFP-HIS3MX6</i> | <i>ygk3:: natMX4</i>  | This study |
| 40 | AIC18* | <i>msn4::hphMX4</i> |  | <i>HSP12::HSP12-GFP-HIS3MX6</i> | <i>hog1:: natMX4</i>  | This study |
| 41 | AIC19* | <i>msn4::hphMX4</i> |  | <i>HSP12::HSP12-GFP-HIS3MX6</i> | <i>msn5:: natMX4</i>  | This study |
| 42 | AIC20* | <i>msn4::hphMX4</i> |  | <i>HSP12::HSP12-GFP-HIS3MX6</i> | <i>eaf7:: natMX4</i>  | This study |
| 43 | ASD1*  |                     |  |                                 | <i>whi2:: natMX4</i>  | This study |
| 44 | ASD2*  |                     |  |                                 | <i>mck1:: natMX4</i>  | This study |
| 45 | ASD3*  |                     |  |                                 | <i>msn5:: natMX4</i>  | This study |
| 46 | APM1*  | <i>msn4::hphMX4</i> |  | <i>PNC1::PNC1-GFP-HIS3MX6</i>   | <i>tpk3:: natMX4</i>  | This study |
| 47 | APM2*  | <i>msn4::hphMX4</i> |  | <i>PNC1::PNC1-GFP-HIS3MX6</i>   | <i>Eaf7:: natMX4</i>  | This study |
| 48 | APM3*  | <i>msn4::hphMX4</i> |  | <i>PNC1::PNC1-GFP-HIS3MX6</i>   | <i>rim15:: natMX4</i> | This study |
| 49 | APM4*  | <i>msn4::hphMX4</i> |  | <i>PNC1::PNC1-GFP-HIS3MX6</i>   | <i>gal11:: natMX4</i> | This study |
| 50 | APM5*  | <i>msn4::hphMX4</i> |  | <i>PNC1::PNC1-GFP-HIS3MX6</i>   | <i>psr1:: natMX4</i>  | This study |
| 51 | APM6*  | <i>msn4::hphMX4</i> |  | <i>PNC1::PNC1-GFP-HIS3MX6</i>   | <i>psr2:: natMX4</i>  | This study |
| 52 | APM7*  | <i>msn4::hphMX4</i> |  | <i>PNC1::PNC1-GFP-HIS3MX6</i>   | <i>ump1:: natMX4</i>  | This study |
| 53 | APM8*  | <i>msn4::hphMX4</i> |  | <i>PNC1::PNC1-GFP-HIS3MX6</i>   | <i>sok2:: natMX4</i>  | This study |
| 54 | APM9*  | <i>msn4::hphMX4</i> |  | <i>PNC1::PNC1-GFP-HIS3MX6</i>   | <i>srb10:: natMX4</i> | This study |

|    |        |                     |  |                               |                       |            |
|----|--------|---------------------|--|-------------------------------|-----------------------|------------|
| 55 | APM10* | <i>msn4::hphMX4</i> |  | <i>PNC1::PNC1-GFP-HIS3MX6</i> | <i>whi2:: natMX4</i>  | This study |
| 56 | APM11* | <i>msn4::hphMX4</i> |  | <i>PNC1::PNC1-GFP-HIS3MX6</i> | <i>mck1:: natMX4</i>  | This study |
| 57 | APM12* | <i>msn4::hphMX4</i> |  | <i>PNC1::PNC1-GFP-HIS3MX6</i> | <i>snf1:: natMX4</i>  | This study |
| 58 | APM1*  | <i>msn4::hphMX4</i> |  | <i>PNC1::PNC1-GFP-HIS3MX6</i> | <i>gis1:: natMX4</i>  | This study |
| 59 | APM14* | <i>msn4::hphMX4</i> |  | <i>PNC1::PNC1-GFP-HIS3MX6</i> | <i>yak1:: natMX4</i>  | This study |
| 60 | APM15* | <i>msn4::hphMX4</i> |  | <i>PNC1::PNC1-GFP-HIS3MX6</i> | <i>ygk3:: natMX4</i>  | This study |
| 61 | APM16* | <i>msn4::hphMX4</i> |  | <i>PNC1::PNC1-GFP-HIS3MX6</i> | <i>hog1:: natMX4</i>  | This study |
| 62 | APM17* | <i>msn4::hphMX4</i> |  | <i>PNC1::PNC1-GFP-HIS3MX6</i> | <i>ump1:: natMX4</i>  | This study |
| 63 | APM18* | <i>msn4::hphMX4</i> |  | <i>PNC1::PNC1-GFP-HIS3MX6</i> | <i>tpk1::natMX4</i>   | This study |
| 64 | APM19* | <i>msn4::hphMX4</i> |  | <i>PNC1::PNC1-GFP-HIS3MX6</i> | <i>tpk2:: natMX4</i>  | This study |
| 65 | APM20* | <i>msn4::hphMX4</i> |  | <i>PNC1::PNC1-GFP-HIS3MX6</i> | <i>msn5:: natMX4</i>  | This study |
| 66 | ATM1*  | <i>msn4::hphMX4</i> |  | <i>TPS2::TPS2-GFP-HIS3MX6</i> | <i>tpk3:: natMX4</i>  | This study |
| 67 | ATM2*  | <i>msn4::hphMX4</i> |  | <i>TPS2::TPS2-GFP-HIS3MX6</i> | <i>Eaf7:: natMX4</i>  | This study |
| 68 | ATM3*  | <i>msn4::hphMX4</i> |  | <i>TPS2::TPS2-GFP-HIS3MX6</i> | <i>rim15:: natMX4</i> | This study |
| 69 | ATM4*  | <i>msn4::hphMX4</i> |  | <i>TPS2::TPS2-GFP-HIS3MX6</i> | <i>gal11:: natMX4</i> | This study |
| 70 | ATM5*  | <i>msn4::hphMX4</i> |  | <i>TPS2::TPS2-GFP-HIS3MX6</i> | <i>psr1:: natMX4</i>  | This study |
| 71 | ATM6*  | <i>msn4::hphMX4</i> |  | <i>TPS2::TPS2-GFP-HIS3MX6</i> | <i>psr2:: natMX4</i>  | This study |
| 72 | ATM7*  | <i>msn4::hphMX4</i> |  | <i>TPS2::TPS2-GFP-HIS3MX6</i> | <i>ump1:: natMX4</i>  | This study |
| 73 | ATM8*  | <i>msn4::hphMX4</i> |  | <i>TPS2::TPS2-GFP-HIS3MX6</i> | <i>sok2:: natMX4</i>  | This study |
| 74 | ATM9*  | <i>msn4::hphMX4</i> |  | <i>TPS2::TPS2-GFP-HIS3MX6</i> | <i>srb10:: natMX4</i> | This study |
| 75 | ATM10* | <i>msn4::hphMX4</i> |  | <i>TPS2::TPS2-GFP-HIS3MX6</i> | <i>whi2:: natMX4</i>  | This study |
| 76 | ATM11* | <i>msn4::hphMX4</i> |  | <i>TPS2::TPS2-GFP-HIS3MX6</i> | <i>mck1:: natMX4</i>  | This study |
| 77 | ATM12* | <i>msn4::hphMX4</i> |  | <i>TPS2::TPS2-GFP-HIS3MX6</i> | <i>snf1:: natMX4</i>  | This study |
| 78 | ATM13* | <i>msn4::hphMX4</i> |  | <i>TPS2::TPS2-GFP-HIS3MX6</i> | <i>gis1:: natMX4</i>  | This study |
| 79 | ATM14* | <i>msn4::hphMX4</i> |  | <i>TPS2::TPS2-GFP-HIS3MX6</i> | <i>yak1:: natMX4</i>  | This study |
| 80 | ATM15* | <i>msn4::</i>       |  | <i>TPS2::TPS2-GFP-HIS3MX6</i> | <i>ygk3:: natMX4</i>  | This study |



|     |        |                     |  |                               |                       |            |
|-----|--------|---------------------|--|-------------------------------|-----------------------|------------|
|     |        | <i>hphMX4</i>       |  |                               |                       |            |
| 81  | ATM16* | <i>msn4::hphMX4</i> |  | <i>TPS2::TPS2-GFP-HIS3MX6</i> | <i>hog1:: natMX4</i>  | This study |
| 82  | ATM17* | <i>msn4::hphMX4</i> |  | <i>TPS2::TPS2-GFP-HIS3MX6</i> | <i>ump1:: natMX4</i>  | This study |
| 83  | ATM18* | <i>msn4::hphMX4</i> |  | <i>TPS2::TPS2-GFP-HIS3MX6</i> | <i>tpk1::natMX4</i>   | This study |
| 84  | ATM19* | <i>msn4::hphMX4</i> |  | <i>TPS2::TPS2-GFP-HIS3MX6</i> | <i>tpk2:: natMX4</i>  | This study |
| 85  | ATM20* | <i>msn4::hphMX4</i> |  | <i>TPS2::TPS2-GFP-HIS3MX6</i> | <i>msn5:: natMX4</i>  | This study |
| 86  | APK1#  | <i>msn4::hphMX4</i> |  | <i>PFK2::PFK2-GFP-HIS3MX6</i> | <i>tpk3:: natMX4</i>  | This study |
| 87  | APK2#  | <i>msn4::hphMX4</i> |  | <i>PFK2::PFK2-GFP-HIS3MX6</i> | <i>Eaf7:: natMX4</i>  | This study |
| 88  | APK3#  | <i>msn4::hphMX4</i> |  | <i>PFK2::PFK2-GFP-HIS3MX6</i> | <i>rim15:: natMX4</i> | This study |
| 89  | APK4#  | <i>msn4::hphMX4</i> |  | <i>PFK2::PFK2-GFP-HIS3MX6</i> | <i>gal11:: natMX4</i> | This study |
| 90  | APK5#  | <i>msn4::hphMX4</i> |  | <i>PFK2::PFK2-GFP-HIS3MX6</i> | <i>psr1:: natMX4</i>  | This study |
| 91  | APK6#  | <i>msn4::hphMX4</i> |  | <i>PFK2::PFK2-GFP-HIS3MX6</i> | <i>psr2:: natMX4</i>  | This study |
| 92  | APK7#  | <i>msn4::hphMX4</i> |  | <i>PFK2::PFK2-GFP-HIS3MX6</i> | <i>ump1:: natMX4</i>  | This study |
| 93  | APK8#  | <i>msn4::hphMX4</i> |  | <i>PFK2::PFK2-GFP-HIS3MX6</i> | <i>sok2:: natMX4</i>  | This study |
| 94  | APK9#  | <i>msn4::hphMX4</i> |  | <i>PFK2::PFK2-GFP-HIS3MX6</i> | <i>srb10:: natMX4</i> | This study |
| 95  | APK10# | <i>msn4::hphMX4</i> |  | <i>PFK2::PFK2-GFP-HIS3MX6</i> | <i>whi2:: natMX4</i>  | This study |
| 96  | APK11# | <i>msn4::hphMX4</i> |  | <i>PFK2::PFK2-GFP-HIS3MX6</i> | <i>mck1:: natMX4</i>  | This study |
| 97  | APK12# | <i>msn4::hphMX4</i> |  | <i>PFK2::PFK2-GFP-HIS3MX6</i> | <i>snf1:: natMX4</i>  | This study |
| 98  | APK13# | <i>msn4::hphMX4</i> |  | <i>PFK2::PFK2-GFP-HIS3MX6</i> | <i>gis1:: natMX4</i>  | This study |
| 99  | APK14# | <i>msn4::hphMX4</i> |  | <i>PFK2::PFK2-GFP-HIS3MX6</i> | <i>yak1:: natMX4</i>  | This study |
| 100 | APK15# | <i>msn4::hphMX4</i> |  | <i>PFK2::PFK2-GFP-HIS3MX6</i> | <i>ygk3:: natMX4</i>  | This study |
| 101 | APK16# | <i>msn4::hphMX4</i> |  | <i>PFK2::PFK2-GFP-HIS3MX6</i> | <i>hog1:: natMX4</i>  | This study |
| 102 | APK17# | <i>msn4::hphMX4</i> |  | <i>PFK2::PFK2-GFP-HIS3MX6</i> | <i>ump1:: natMX4</i>  | This study |
| 103 | APK18# | <i>msn4::hphMX4</i> |  | <i>PFK2::PFK2-GFP-HIS3MX6</i> | <i>tpk1::natMX4</i>   | This study |
| 104 | APK19# | <i>msn4::hphMX4</i> |  | <i>PFK2::PFK2-GFP-HIS3MX6</i> | <i>tpk2:: natMX4</i>  | This study |
| 105 | APK20# | <i>msn4::hphMX4</i> |  | <i>PFK2::PFK2-GFP-HIS3MX6</i> | <i>msn5:: natMX4</i>  | This study |

|     |        |                                 |                                        |            |
|-----|--------|---------------------------------|----------------------------------------|------------|
| 106 | ASM1#  | <i>HSP12::HSP12-GFP-HIS3MX6</i> | <i>msn2:: kanMX6</i>                   | This study |
| 107 | ASM2#  | <i>HSP12::HSP12-GFP-HIS3MX6</i> | <i>tpk3:: kanMX6</i>                   | This study |
| 108 | ASM3#  | <i>HSP12::HSP12-GFP-HIS3MX6</i> | <i>Eaf7:: kanMX6</i>                   | This study |
| 109 | ASM4#  | <i>HSP12::HSP12-GFP-HIS3MX6</i> | <i>rim15:: kanMX6</i>                  | This study |
| 110 | ASM5#  | <i>HSP12::HSP12-GFP-HIS3MX6</i> | <i>gal11:: kanMX6</i>                  | This study |
| 111 | ASM6#  | <i>HSP12::HSP12-GFP-HIS3MX6</i> | <i>psr1:: kanMX6</i>                   | This study |
| 112 | ASM7#  | <i>HSP12::HSP12-GFP-HIS3MX6</i> | <i>psr2:: kanMX6</i>                   | This study |
| 113 | ASM8#  | <i>HSP12::HSP12-GFP-HIS3MX6</i> | <i>ump1:: kanMX6</i>                   | This study |
| 114 | ASM9#  | <i>HSP12::HSP12-GFP-HIS3MX6</i> | <i>sok2:: kanMX6</i>                   | This study |
| 115 | ASM10# | <i>HSP12::HSP12-GFP-HIS3MX6</i> | <i>srb10:: kanMX6</i>                  | This study |
| 116 | ASM11# | <i>HSP12::HSP12-GFP-HIS3MX6</i> | <i>whi2:: kanMX6</i>                   | This study |
| 117 | ASM12# | <i>HSP12::HSP12-GFP-HIS3MX6</i> | <i>mck1:: kanMX6</i>                   | This study |
| 118 | ASM13# | <i>HSP12::HSP12-GFP-HIS3MX6</i> | <i>snf1:: kanMX6</i>                   | This study |
| 119 | ASM14# | <i>HSP12::HSP12-GFP-HIS3MX6</i> | <i>gis1:: kanMX6</i>                   | This study |
| 120 | ASM15# | <i>HSP12::HSP12-GFP-HIS3MX6</i> | <i>yak1:: kanMX6</i>                   | This study |
| 121 | ASM16# | <i>HSP12::HSP12-GFP-HIS3MX6</i> | <i>ygk3:: kanMX6</i>                   | This study |
| 122 | ASM17# | <i>HSP12::HSP12-GFP-HIS3MX6</i> | <i>hog1:: kanMX6</i>                   | This study |
| 123 | ASM18# | <i>HSP12::HSP12-GFP-HIS3MX6</i> | <i>ump1:: kanMX6</i>                   | This study |
| 124 | ASM19# | <i>HSP12::HSP12-GFP-HIS3MX6</i> | <i>tpk1:: kanMX6</i>                   | This study |
| 125 | ASM20# | <i>HSP12::HSP12-GFP-HIS3MX6</i> | <i>tpk2:: kanMX6</i>                   | This study |
| 126 | ASM21# | <i>HSP12::HSP12-GFP-HIS3MX6</i> | <i>msn5:: kanMX6</i>                   | This study |
| 127 | ASM22# | <i>HSP12::HSP12-GFP-HIS3MX6</i> | <i>gcn5:: kanMX6</i>                   | This study |
| 128 | ASM23# | <i>HSP12::HSP12-GFP-HIS3MX6</i> | <i>Glc7-damp::<br/>kanMX6</i>          | This study |
| 129 | ASM24# | <i>HSP12::HSP12-GFP-HIS3MX6</i> | <i>msn4:: kanMX6</i>                   | This study |
| 130 | ASM25# | <i>HSP12::HSP12-GFP-HIS3MX6</i> | <i>rim11:: kanMX6</i>                  | This study |
| 131 | ASM26# | <i>HSP12::HSP12-GFP-HIS3MX6</i> | <i>hsp82:: kanMX6</i>                  | This study |
| 132 | ASM27# | <i>HSP12::HSP12-GFP-HIS3MX6</i> | <i>mrk1:: kanMX6</i>                   | This study |
| 133 | ASM28# | <i>HSP12::HSP12-GFP-HIS3MX6</i> | <i>rim11:: kanMX6</i>                  | This study |
| 134 | ASM29# | <i>HSP12::HSP12-GFP-HIS3MX6</i> | <i>bnr1:: kanMX6</i>                   | This study |
| 135 | ASM30# | <i>HSP12::HSP12-GFP-HIS3MX6</i> | <i>hsp104:: kanMX6</i>                 | This study |
| 136 | ASM31# | <i>HSP12::HSP12-GFP-HIS3MX6</i> | <i>Tom1:: kanMX6</i>                   | This study |
| 137 | ASM32# | <i>HSP12::HSP12-GFP-HIS3MX6</i> | <i>Had3:: kanMX6</i>                   | This study |
| 138 | ASM33# | <i>HSP12::HSP12-GFP-HIS3MX6</i> | <i>Cyr1-damp::<br/>kanMX6</i>          | This study |
| 139 | ASM34# | <i>HSP12::HSP12-GFP-HIS3MX6</i> | <i>tor1:: kanMX6</i>                   | This study |
| 140 | ASM35# | <i>HSP12::HSP12-GFP-HIS3MX6</i> | <i>Tor2-damp::<br/>kanMX6</i>          | This study |
| 141 | ASM36# | <i>HSP12::HSP12-GFP-HIS3MX6</i> | <i>Cdc25-damp::<br/>kanMX6</i>         | This study |
| 142 | ASM37# | <i>HSP12::HSP12-GFP-HIS3MX6</i> | <i>Eaf7:: kanMX6</i>                   | This study |
| 143 | ASM38# | <i>HSP12::HSP12-GFP-HIS3MX6</i> | <i>Tpk3:: kanMX6</i>                   | This study |
| 144 | ASM39# | <i>HSP12::HSP12-GFP-HIS3MX6</i> | <i>Sok2:: kanMX6</i>                   | This study |
| 145 | ASM40# | <i>HSP12::HSP12-GFP-HIS3MX6</i> | <i>Ras2:: kanMX6</i>                   | This study |
| 146 | ASM41# | <i>HSP12::HSP12-GFP-HIS3MX6</i> | <i>tor1:: kanMX6<br/>whi2:: natMX4</i> | This study |
| 147 | ASM42# | <i>HSP12::HSP12-GFP-HIS3MX6</i> | <i>Cdc25-damp::</i>                    | This study |

|     |        |                                 |                                                             |            |
|-----|--------|---------------------------------|-------------------------------------------------------------|------------|
|     |        |                                 | <i>kanMX6</i><br><i>whi2:: natMX4</i>                       |            |
| 148 | ASM43# | <i>HSP12::HSP12-GFP-HIS3MX6</i> | <i>Tor2-damp::</i><br><i>kanMX6</i><br><i>whi2:: natMX4</i> | This study |
| 149 | ASM44# | <i>HSP12::HSP12-GFP-HIS3MX6</i> | <i>Tpk3:: kanMX6</i><br><i>whi2:: natMX4</i>                | This study |
| 150 | ASM45# | <i>HSP12::HSP12-GFP-HIS3MX6</i> | <i>Ras2:: kanMX6</i><br><i>whi2:: natMX4</i>                | This study |

\*- strains created on W303-1A background

#- strains created on S288c background
